# Supplementary material for: Measurement report: Short-term variation in ammonia concentrations in an urban area increased by mist evaporation and emissions from a forest canopy with bird droppings
Source: Copernicus journal article supplement (doi:10.5194/acp-20-11941-2020), 2020-10-23
Supplement: Supplementary file 1 [file acp-20-11941-2020-supplement.pdf]

Supplement of Atmos. Chem. Phys., 20, 11941–11954, 2020  
<https://doi.org/10.5194/acp-20-11941-2020-supplement>  
© Author(s) 2020. This work is distributed under  
the Creative Commons Attribution 4.0 License.

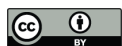

*Supplement of*

**Measurement report: Short-term variation in ammonia concentrations in an urban area increased by mist evaporation and emissions from a forest canopy with bird droppings**

**Kazuo Osada**

*Correspondence to:* Kazuo Osada (kosada@nagoya-u.jp)

The copyright of individual parts of the supplement might differ from the CC BY 4.0 License.

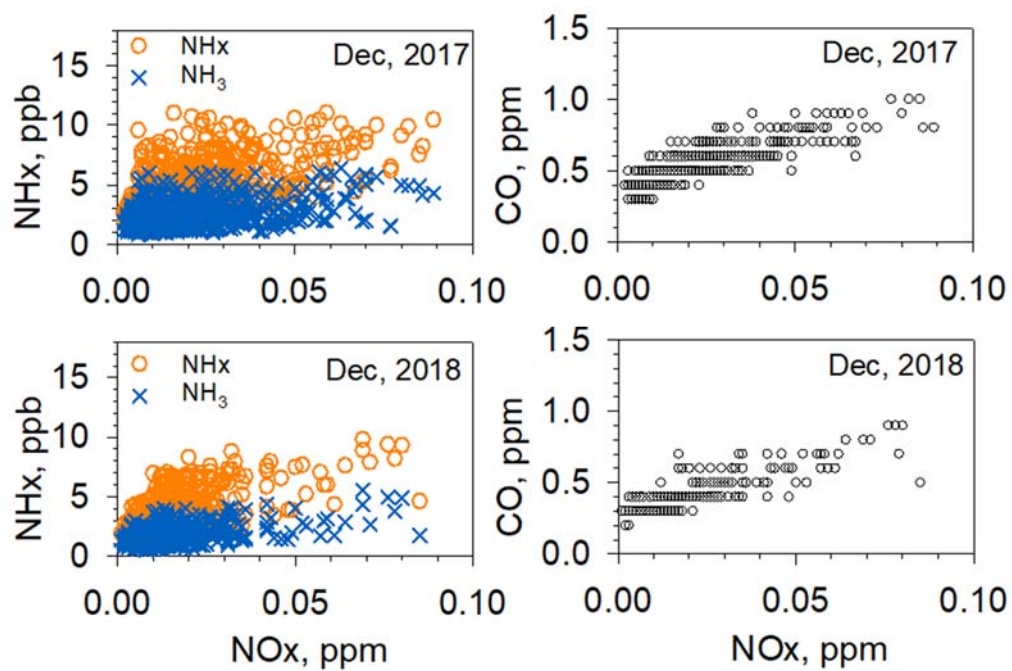

Supplement Figure S1 Scatter plots between NO<sub>x</sub> and NH<sub>x</sub> (NH<sub>3</sub> + NH<sub>4</sub><sup>+</sup>), and NO<sub>x</sub> and CO concentrations. Upper row, December, 2017; lower row, December, 2018.
